# Supplementary material for: Adhering to dietary guidelines does not yield flavanol intake levels associated with beneficial cardiovascular effects
Source: Royal Society of Chemistry journal article supplement (doi:10.1039/d6fo00867d), 2026-06-08
Supplement: d6fo00867d1.pdf [file d6fo00867d1.pdf]

## Supplementary information

Supplemental Table 1: Odd ratio (OR) for meeting a biomarker-estimated flavanol intake of at least 500 mg/d in COSMOS and EPIC Norfolk, comparing sex, age and BMI using logistic regression analysis

|                                   | COSMOS            | EPIC Norfolk      |
|-----------------------------------|-------------------|-------------------|
| Sex (Male vs Female)              | 1.34 (1.16; 1.54) | 1.36 (1.27; 1.45) |
| Age (75 vs 65 years old)          | 1.21 (1.06; 1.39) | 0.91 (0.83; 0.99) |
| BMI (30 vs 25 kg/m <sup>2</sup> ) | 0.92 (0.85; 0.98) | 1.12 (1.07; 1.17) |

Supplemental Table 2: Association between markers of diet quality and urinary flavanol in COSMOS (difference in log<sub>2</sub> biomarker between bottom and top quartile of respective marker, adjusted by age, sex and BMI; 95% confidence interval and Wald-test).

|                     | SREM <sub>B</sub>   |                  | gVLM <sub>B</sub>  |                  |
|---------------------|---------------------|------------------|--------------------|------------------|
|                     | β (95% CI)          | p                | β (95% CI)         | p                |
| Fruits              | 0.09 (0; 0.17)      | 0.057            | 0.08 (-0.01; 0.16) | <b>0.003</b>     |
| Vegetables          | -0.04 (-0.12; 0.04) | 0.334            | 0.03 (-0.05; 0.11) | 0.314            |
| Fruits & Vegetables | 0.03 (-0.05; 0.11)  | 0.650            | 0.06 (-0.02; 0.14) | 0.056            |
| Tea                 | 0.26 (0.13; 0.40)   | <b>&lt;0.001</b> | 0.22 (0.08; 0.35)  | <b>0.006</b>     |
| aHEI                | 0.13 (0.03; 0.23)   | <b>0.029</b>     | 0.33 (0.23; 0.43)  | <b>&lt;0.001</b> |

Supplemental Table 3: Association between markers of diet quality and urinary flavanol in EPIC Norfolk (difference in log<sub>2</sub> biomarker between bottom and top quartile of respective marker, adjusted by age, sex and BMI; 95% confidence interval and Wald-test).

|                     | SREM <sub>B</sub>    |        | gVLM <sub>B</sub>    |        |
|---------------------|----------------------|--------|----------------------|--------|
|                     | β (95% CI)           | p      | β (95% CI)           | p      |
| Fruits              | -0.06 (-0.11; -0.02) | 0.0107 | -0.15 (-0.21; -0.1)  | <0.001 |
| Vegetables          | -0.09 (-0.13; -0.06) | <0.001 | -0.1 (-0.14; -0.05)  | <0.001 |
| Fruits & Vegetables | -0.08 (-0.12; -0.05) | <0.001 | -0.14 (-0.19; -0.1)  | <0.001 |
| Vitamin C           | -0.14 (-0.17; -0.1)  | <0.001 | -0.09 (-0.13; -0.04) | <0.001 |
| Tea                 | 0.61 (0.58; 0.65)    | <0.001 | 0.28 (0.23; 0.33)    | <0.001 |

Supplemental Table 4: List of twenty most frequency consumed fruits and vegetables in NHANES 2017-2019.

Portion size was reported according to 21 CFR § 101.12.

| Food                        | Frequency<br>(number of mentions in dietary recall) | Portion size<br>(g) |
|-----------------------------|-----------------------------------------------------|---------------------|
| Banana, raw                 | 1112                                                | 140                 |
| Apple [Dessert], whole, raw | 852                                                 | 140                 |
| Tomato, whole, raw          | 705                                                 | 85                  |
| Grape [Black]               | 463                                                 | 140                 |
| Grape [Green]               | 463                                                 | 140                 |
| Orange [Blond]              | 450                                                 | 140                 |
| Carrot, raw                 | 394                                                 | 85                  |
| Strawberry, raw             | 386                                                 | 140                 |
| Cucumber, raw               | 368                                                 | 85                  |
| Green bean, raw             | 290                                                 | 85                  |
| Melon                       | 243                                                 | 140                 |
| Avocado, raw                | 188                                                 | 50                  |
| Peanut                      | 185                                                 | 30                  |
| Almond                      | 172                                                 | 30                  |
| Highbush blueberry, raw     | 152                                                 | 140                 |
| Pineapple                   | 149                                                 | 140                 |
| Lettuce [Green], raw        | 126                                                 | 85                  |
| Mango                       | 108                                                 | 140                 |
| Grape, raisin               | 101                                                 | 40                  |
| Pear, whole                 | 99                                                  | 140                 |

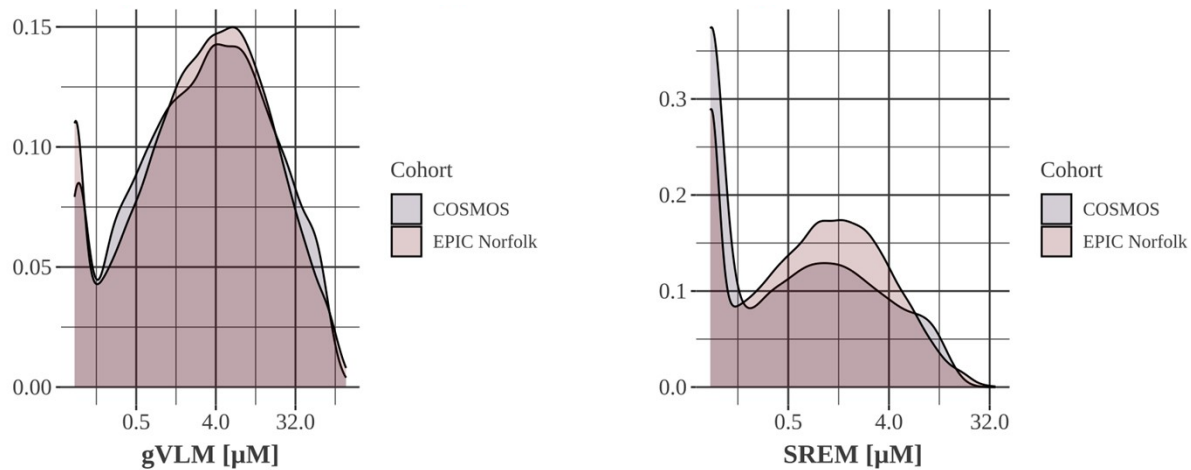

Supplemental Figure 1: Distribution of  $\text{gVLM}_B$  and  $\text{SREM}_B$  concentration between COSMOS and EPIC Norfolk.  $\text{gVLM}_B$ : 5-(3',4'-dihydroxyphenyl)- $\gamma$ -valerolactone metabolites;  $\text{SREM}_B$ : structurally related (-)-epicatechin metabolites

## Sensitivity analysis

Proportion of participants with at least 5 portions of F&V meeting flavan

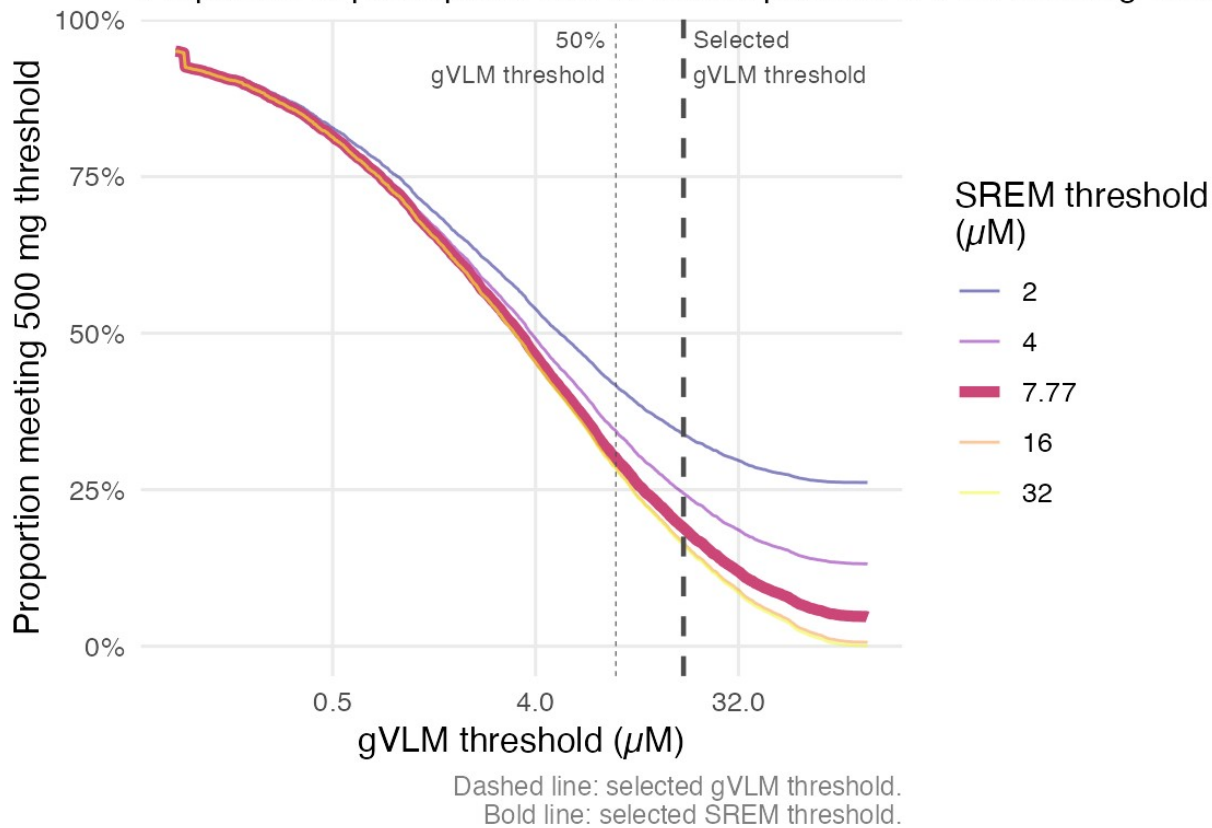

Supplemental Figure 2: Sensitivity analysis assessing changes in the proportion of participants meeting a biomarker-estimated intake of 500 mg of flavanols among participants having at least 5 portions of fruit and vegetables when varying the threshold for the biomarkers 5-(3',4'-dihydroxyphenyl)- $\gamma$ -valerolactone metabolites (gVLM<sub>B</sub>) and structurally related (-)-epicatechin metabolites (SREM<sub>B</sub>) in COSMOS and EPIC studies.
